# Supplementary material for: Oleate vesicle template route to silver nanowires
Source: Royal Society of Chemistry journal article supplement (doi:10.1039/b103718h), 2001-01-01
Supplement: b103718h1.doc [file b103718h1.doc]

**Figure S1** Low-angle XRD patterns of sodium oleate/1-octanol/aqueous AgNO3

solution. (a) before UV irradiated, and (b) after 48-h UV irradiation.
