# Supplementary material for: Oleate vesicle template route to silver nanowires
Source: Royal Society of Chemistry journal article supplement (doi:10.1039/b103718h), 2001-01-01
Supplement: b103718h3.doc [file b103718h3.doc]

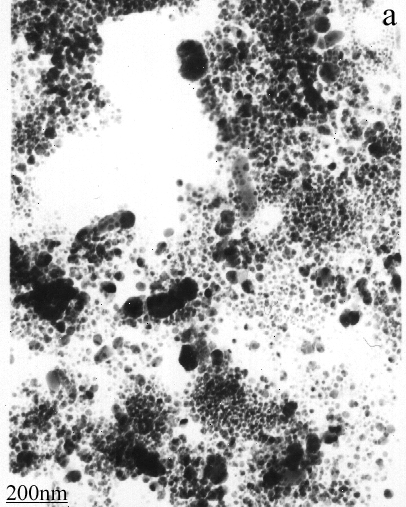

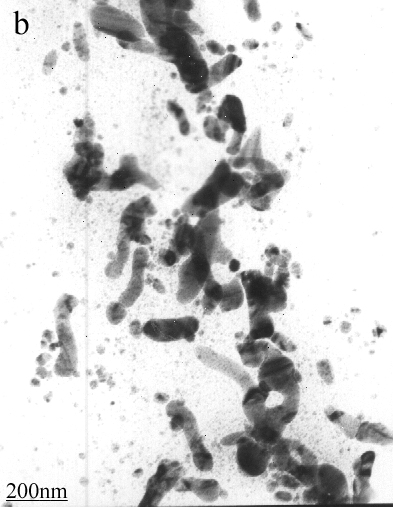


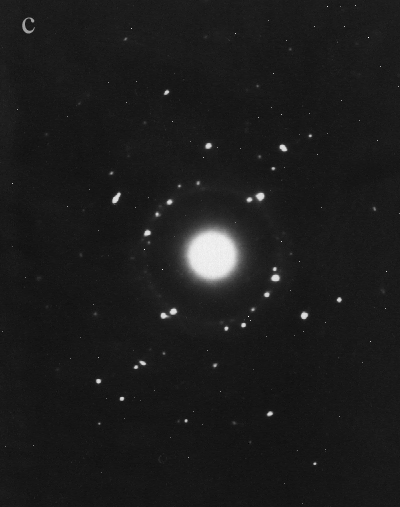

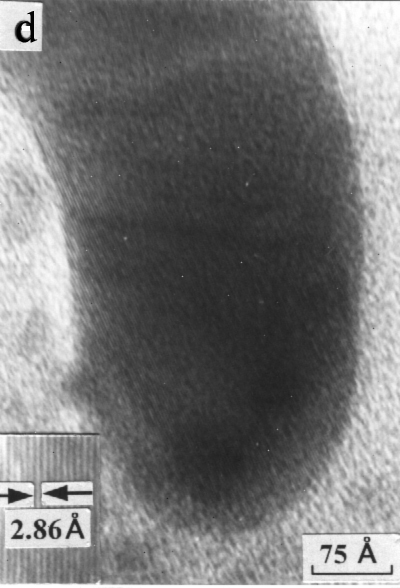


**Figure S3** TEM images for silver nanostructures. (a) particles via 6-h UV irradiation, (b) rods via 24-h UV irradiation, (c) ED image for Ag nanowires, (d) HRTEM of Ag nanowire with respect to the 110 plane 2.86 Å.
